# Supplementary material
Source: MDPI journal article supplement (https://www.mdpi.com/2073-4441/12/10/2754)
Supplement: s1 [file s1]

# Supplementary Material

## Desorption of Organic Micropollutants from Loaded Granular Activated Carbon

Daniela Reif <sup>1,\*</sup>, Ernis Saracevic <sup>1</sup>, Monika Šabić Runjavec <sup>2</sup>, Julia Haslinger <sup>1</sup>, Heidemarie Schaar <sup>1</sup> and Norbert Kreuzinger <sup>1</sup>

<sup>1</sup> Institute of Water Quality and Resource Management, TU Wien, Karlsplatz 13/226-1, 1040 Vienna, Austria; daniela.reif@tuwien.ac.at (D.R.); ernis.saracevic@tuwien.ac.at (E.S.); julia.haslinger@denkstatt.at (J.H.); hschaar@iwag.tuwien.ac.at (H.S.); norbkreu@iwag.tuwien.ac.at (N.K.)

<sup>2</sup> Faculty of Chemical Engineering and Technology, University of Zagreb, Marulićev trg 19, 10-000 Zagreb, Croatia; msabic@fkit.hr

\* Correspondence: daniela.reif@tuwien.ac.at

### List of Figures:

- **Page 2: Figure S1.** Cumulated mass (mg) and feed and effluent concentrations (ng/L) of (a) sulfamethoxazole, (b) diclofenac, (c) bezafibrate and (d) metoprolol and cumulated adsorbed mass of DOC (e).
- **Page 3: Figure S2.** Relation between the  $\Delta$ concentrations (adsorbed concentrations) and feed concentrations of the substances (a) benzotriazole, (b) carbamazepine, (c) acesulfame K, (d) ibuprofen, (e) sulfamethoxazole, (f) bezafibrate, (g) diclofenac and (h) metoprolol during the 27-month operation of the pilot-scale filter.
- **Page 4: Table S1.** Concentrations of all analyzed substances during backwashing at 2860 bed volumes. IN represents the feed concentration at the time of backwashing; OUT, the outlet concentration before backwashing. BACK\_1 was measured at the beginning of backwashing (flow, 5 m<sup>3</sup>/h), and BACK\_2, after 30 minutes of backwashing (flow, 30 m<sup>3</sup>/h). The organic micropollutant concentrations in the WELL WATER used for backwashing were measured.
- **Page 4: Table S2.** Concentrations of all analyzed substances during backwashing at 3960 bed volumes. IN represents the feed concentration at the time of backwashing; OUT, the outlet concentration before backwashing. BACK\_1 was measured at the beginning of backwashing (flow, 5 m<sup>3</sup>/h), and BACK\_2, after 30 minutes of backwashing (flow, 30 m<sup>3</sup>/h). The organic micropollutant concentrations in the WELL WATER used for backwashing were measured.
- **Page 5: Figure S3.** Results of adsorption batch experiments for the determination of Freundlich and Langmuir isotherm parameters of (a) benzotriazole, (b) carbamazepine, (c) acesulfame K, (d) ibuprofen.
- **Page 5: Table S3.** Theoretical extraction efficiencies for GAC and powdered GAC (ground with a lab mill), representing the ratio between desorbed loadings at an AC/solvent ratio of 10 g/L and the cumulated loadings.

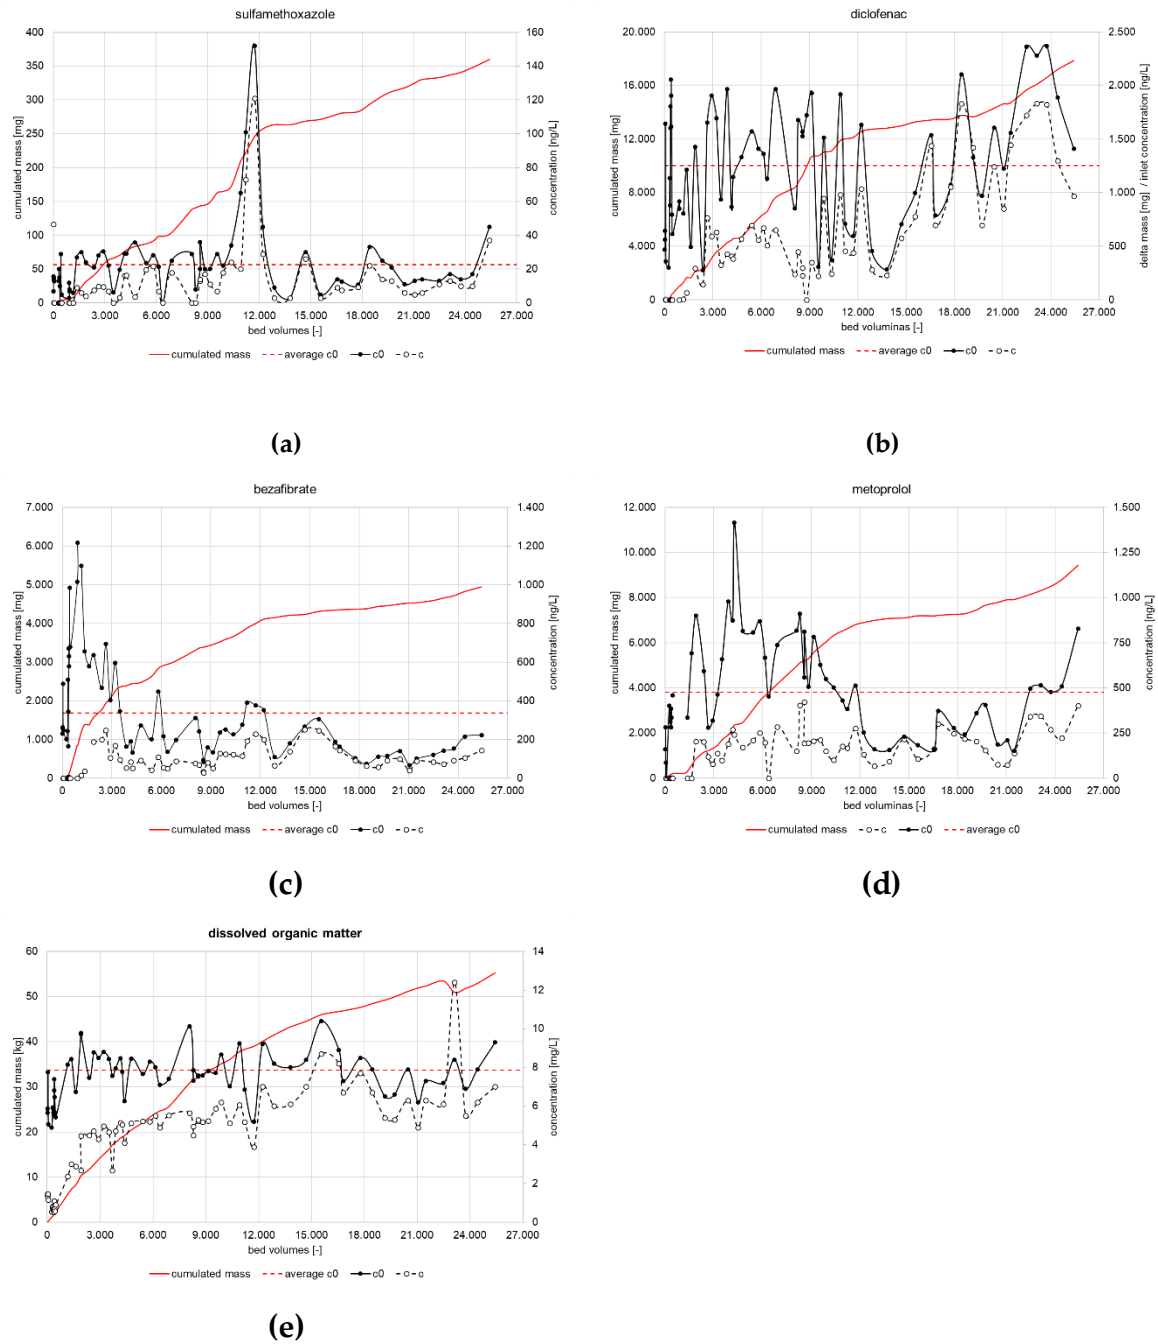

**Figure S1.** Cumulated mass (mg) and feed and effluent concentrations (ng/L) of (a) sulfamethoxazole, (b) diclofenac, (c) bezafibrate and (d) metoprolol and cumulated adsorbed mass of DOC (e).

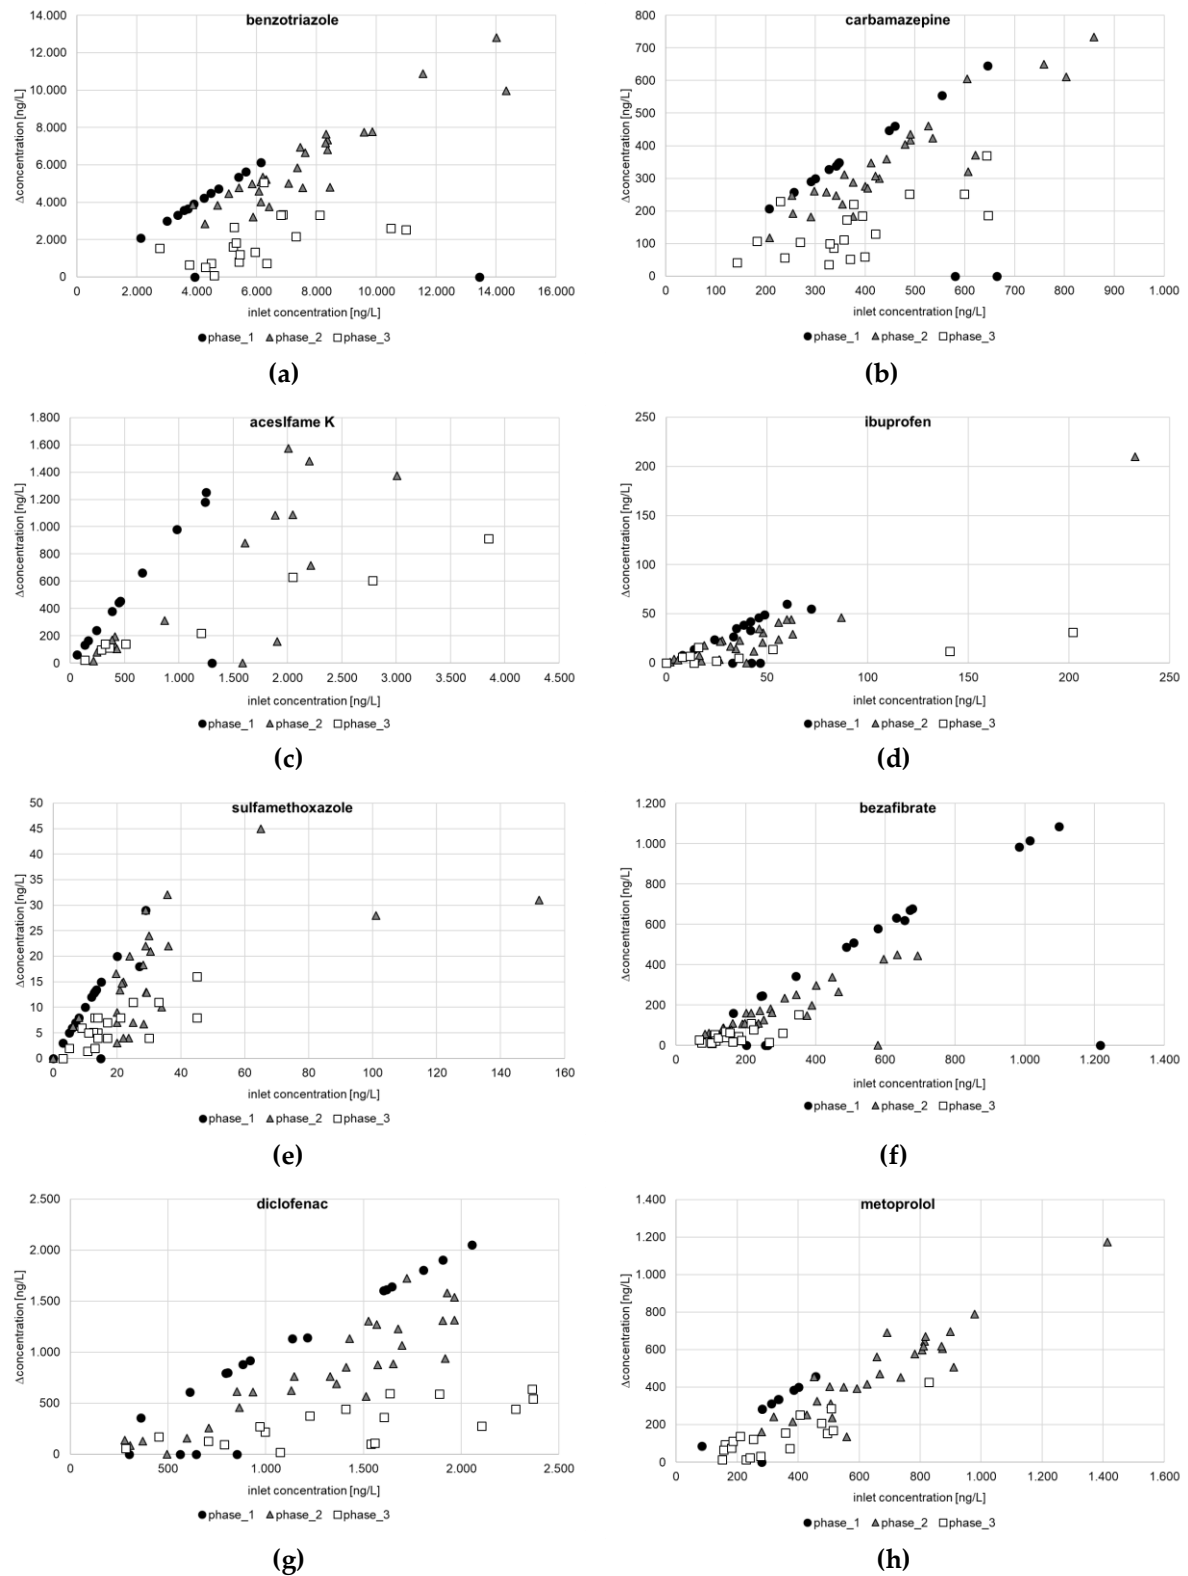

**Figure S2.** Relation between the  $\Delta$ concentrations (adsorbed concentrations) and feed concentrations of the substances (a) benzotriazole, (b) carbamazepine, (c) acesulfame K, (d) ibuprofen, (e) sulfamethoxazole, (f) bezafibrate, (g) diclofenac and (h) metoprolol during the 27-month operation of the pilot-scale filter.

**Table S1.** Concentrations of all analyzed substances during backwashing at 2860 bed volumes. IN represents the feed concentration at the time of backwashing; OUT, the outlet concentration before backwashing. BACK\_1 was measured at the beginning of backwashing (flow, 5 m<sup>3</sup>/h), and BACK\_2, after 30 minutes of backwashing (flow, 30 m<sup>3</sup>/h). The organic micropollutant concentrations in the WELL WATER used for backwashing were measured.

|            | <b>BTA</b> | <b>CBZ</b> | <b>ACS</b> | <b>IBP</b> | <b>SMX</b> | <b>DCF</b> | <b>BZF</b> | <b>MET</b> |
|------------|------------|------------|------------|------------|------------|------------|------------|------------|
| IN         | 7632       | 298        | 2007       | 56         | 24         | 1428       | 635        | 899        |
| OUT        | 980        | 38         | 434        | 15         | 4          | 294        | 187        | 203        |
| WELL WATER | 160        | 28         | 53         | 0          | 0          | 0          | 0          | 42         |
| BACK_1     | 7464       | 246        | 1740       | 25         | 19         | 1065       | 429        | 629        |
| BACK_2     | 115        | 7          | 75         | 0          | 0          | 0          | 2          | 20         |

**Table S2.** Concentrations of all analyzed substances during backwashing at 3960 bed volumes. IN represents the feed concentration at the time of backwashing; OUT, the outlet concentration before backwashing. BACK\_1 was measured at the beginning of backwashing (flow, 5 m<sup>3</sup>/h), and BACK\_2, after 30 minutes of backwashing (flow, 30 m<sup>3</sup>/h). The organic micropollutant concentrations in the WELL WATER used for backwashing were measured.

|            | <b>BTA</b> | <b>CBZ</b> | <b>ACS</b> | <b>IBP</b> | <b>SMX</b> | <b>DCF</b> | <b>BZF</b> | <b>MET</b> |
|------------|------------|------------|------------|------------|------------|------------|------------|------------|
| IN         | 7073       | 401        | 2048       | 37         | 28         | 1653       | 693        | 280        |
| OUT        | 2075       | 126        | 961        | 14         | 10         | 765        | 248        | 119        |
| WELL WATER | 0          | 34         | 50         | 0          | 0          | 137        | -3         | 2          |
| BACK_1     | 8489       | 485        | 931        | 14         | 18         | 993        | 297        | 319        |
| BACK_2     | 46         | 34         | 283        | 0          | 0          | 581        | 53         | 23         |

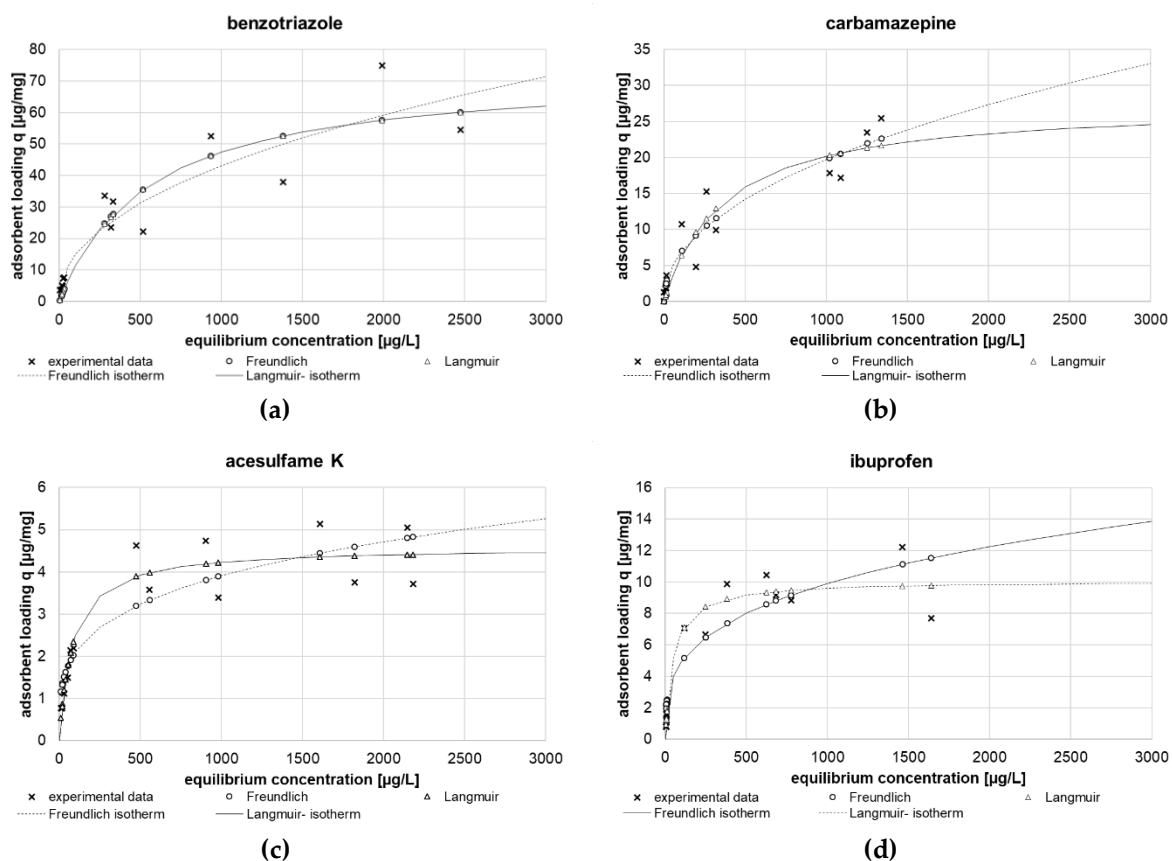

**Figure S3.** Results of adsorption batch experiments for the determination of Freundlich and Langmuir isotherm parameters of (a) benzotriazole, (b) carbamazepine, (c) acesulfame K, (d) ibuprofen.

**Table S3.** Theoretical extraction efficiencies for GAC and powdered GAC (ground with a lab mill), representing the ratio between desorbed loadings at an AC/solvent ratio of 10 g/L and the cumulated loadings.

|                  | GAC (10 g/L) | pGAC (10 g/L) |
|------------------|--------------|---------------|
| metoprolol       | 0.86%        | 1.83%         |
| benzotriazole    | 6.85%        | 14.18%        |
| sulfamethoxazole | -            | -             |
| carbamazepine    | 8.14%        | 9.71%         |
| Acesulfame K     | 0.50%        | 3.71%         |
| bezafibrate      | 2.44%        | 1.99%         |
| diclofenac       | 1.52%        | 0.92%         |
| ibuprofen        | 26.17%       | 32.30%        |
